# Supplementary material for: Unraveling the role of CACNA1F, RASAL1, GARIN4, and TRIM56 in common opioid side effects via transcriptomic analysis of differentiated neuron-like SH-SY5Y cells
Source: Research Square preprint supplement (doi:10.21203/rs.3.rs-7327879/v1), 2025-09-22
Supplement: Supplementary file 1 [file e130fd7fbac0c2239a598d01.docx]

Supplementary Data

Unraveling the role of CACNA1F, RASAL1, GARIN4, and TRIM56 in common opioid side effects via transcriptomic analysis of differentiated neuron-like SH-SY5Y cells

Aly Abotaleb¹,²*, Nguyen Phan Khoi Le³,⁴, Sara Tucci¹, Martin J. Hug¹, Evelyn Lamy³,⁴, Stefan Günther2*

AUTHOR ADDRESS

¹ Pharmacy, Medical Center – University of Freiburg, Freiburg, Germany

² Institute of Pharmaceutical Sciences, Faculty of Chemistry and Pharmacy, University of Freiburg, Freiburg, Germany

³ Molecular Preventive Medicine, University Medical Center and Faculty of Medicine, University of Freiburg, Freiburg, Germany

⁴ Chair for Research of Environment-Related Mechanisms of Action on Health, Medical Faculty, University of Augsburg, Augsburg, Germany

⁵ Department of Microbiology and Immunology, Pasteur Institute in Ho Chi Minh City, Ho Chi Minh City, Vietnam

***Corresponding authors**

Aly Abotaleb; [aly.abotaleb@uniklinik-freiburg.de](mailto:aly.abotaleb@uniklinik-freiburg.de)

Stefan Günther; [stefan.guenther@pharmazie.uni-freiburg.de](mailto:stefan.guenther@pharmazie.uni-freiburg.de)

Table of Contents

[**Figure S1. Per Sequence GC Content: 2**](#_jm11le534zeg)

[**Figure S2. Sequence Count: 3**](#_iqdnpzglil32)

[**Figure S3. Per Sequence Quality Scores: 4**](#_je60451sywoj)

[**Figure S4. Mean Quality Score: 5**](#_v9sgbfrikp9o)

[**Table S1. Downregulated Genes After Opioid Treatment 6**](#_623cfla3gm3s)


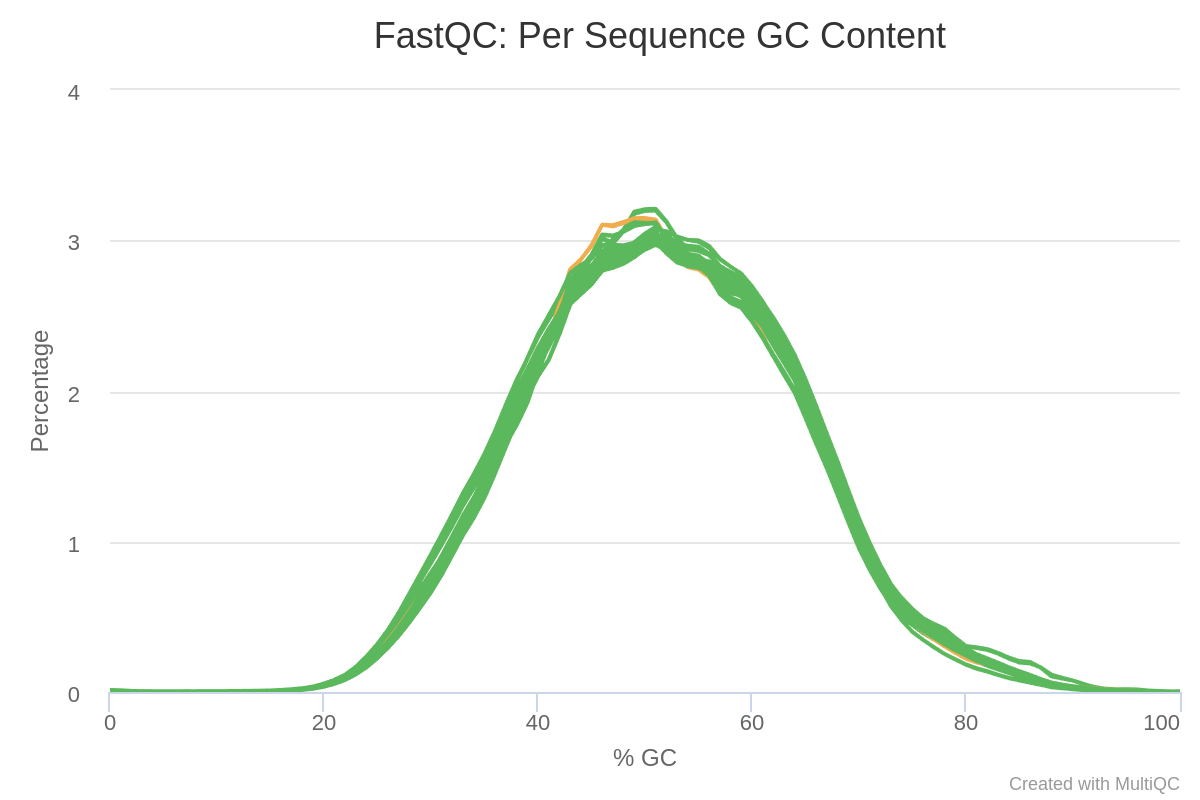


# **Figure S1. Per Sequence GC Content**:

Displays the distribution of GC content across all sequences. A normal distribution suggests uniform GC content.


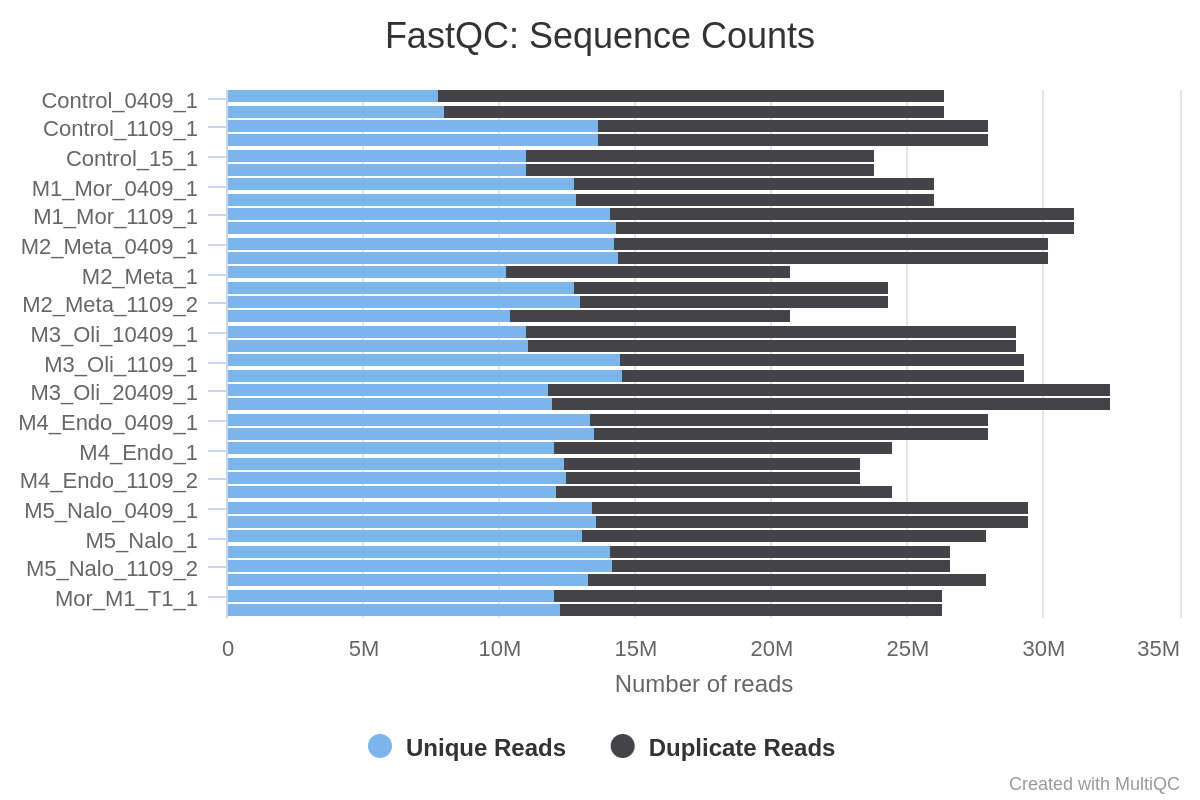


# **Figure S2. Sequence Count**:

Indicates the total number of reads in the sequencing dataset. A higher read count improves transcriptome coverage and statistical robustness in downstream analysis.


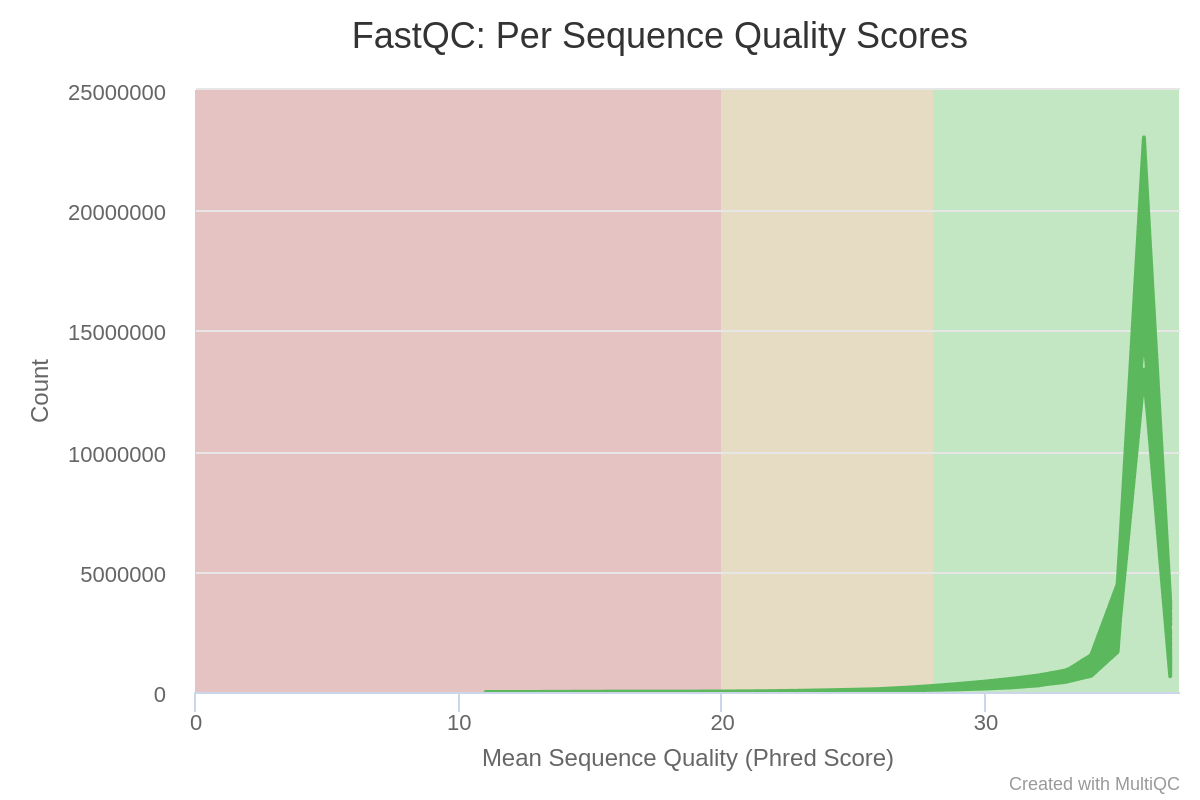


# **Figure S3. Per Sequence Quality Scores**:

Shows the average quality score per read. Most reads are expected to have high Phred scores, indicating good base call accuracy


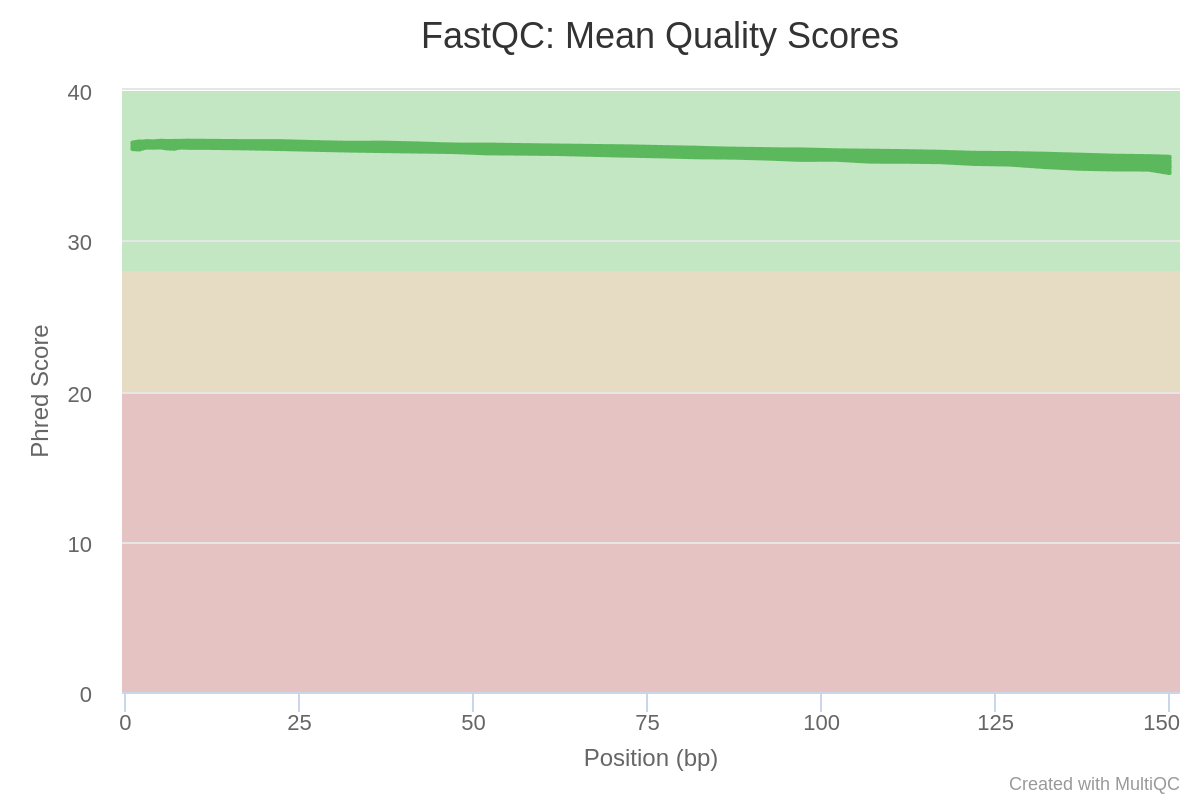


# **Figure S4. Mean Quality Score**:

Represents the average Phred quality score across all bases and reads in the dataset. A high mean quality score reflects overall sequencing reliability.

| Ensembl | baseMean | log2FoldChange | pvalue | padj | Gene Symbol | Gene Name |
| --- | --- | --- | --- | --- | --- | --- |
| ENSG00000235862 | 4.28 | -4.33 | 2.34E-07 | 0.003 |  |  |
| ENSG00000162771 | 4.21 | -4.48 | 6.69E-08 | 0.002 | Q8IYT1 | GARIN4 |
| ENSG00000169871 | 11.45 | -3.97 | 1.02E-05 | 0.040 | Q9BRZ2 | TRIM56_HUMAN |
| ENSG00000102001 | 10.25 | -5.52 | 1.98E-06 | 0.011 | O60840 | CACNA1F |
| ENSG00000180210 | 5.97 | -3.16 | 1.95E-05 | 0.049 | P00734 | F2 |
| ENSG00000111344 | 7.01 | -3.54 | 1.26E-05 | 0.043 | O95294 | RASAL1 |
| ENSG00000274376 | 10.09 | -2.84 | 3.50E-06 | 0.016 |  |  |
| ENSG00000167483 | 20.26 | -2.38 | 1.78E-05 | 0.049 | Q86XR2 | NIBAN3 |
| ENSG00000279175 | 5.39 | -4.65 | 1.45E-05 | 0.044 |  |  |
| ENSG00000280800 | 16.27 | -4.06 | 7.07E-07 | 0.005 |  |  |
| ENSG00000281383 | 18.44 | -3.57 | 2.73E-07 | 0.003 |  |  |

# **Table S1. Downregulated Genes After Opioid Treatment**

Table S1. List of significantly downregulated genes in SH-SY5Y cells treated with opioids for 15 minutes. The table includes Ensembl ID, base mean expression, log2 fold change, p-value, adjusted p-value (padj), gene symbol, and gene name.
